# Supplementary material
Source: Springer Nature journal article supplement (https://www.springermedizin.de/resource/supplementary/12913_2013_3166_MOESM1_ESM.pdf/9532546)
Supplement: MOESM1 [file 9532546]

ANC clinics (n=10)

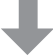

Formative research

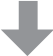

Design of the intervention

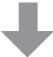

Training sessions in ANC clinics

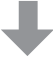

Randomization

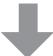

Sequential deployment of the intervention

18 Month

6 Month

3 Month

|         |    | MONTH |   |   |   |   |   |   |   |   |    |    |    |    |    |    |    |    |    |    |    |    |    |
|---------|----|-------|---|---|---|---|---|---|---|---|----|----|----|----|----|----|----|----|----|----|----|----|----|
|         |    | 1     | 2 | 3 | 4 | 5 | 6 | 7 | 8 | 9 | 10 | 11 | 12 | 13 | 14 | 15 | 16 | 17 | 18 | 19 | 20 | 21 | 22 |
| CLINICS | 1  |       |   | █ | █ | █ | █ | █ | █ | █ | █  | █  | █  | █  | █  | █  | █  | █  | █  | █  | █  | █  | █  |
|         | 2  |       |   |   |   | █ | █ | █ | █ | █ | █  | █  | █  | █  | █  | █  | █  | █  | █  | █  | █  | █  | █  |
|         | 3  |       |   |   |   |   |   | █ | █ | █ | █  | █  | █  | █  | █  | █  | █  | █  | █  | █  | █  | █  | █  |
|         | 4  |       |   |   |   |   |   |   |   | █ | █  | █  | █  | █  | █  | █  | █  | █  | █  | █  | █  | █  | █  |
|         | 5  |       |   |   |   |   |   |   |   |   |    | █  | █  | █  | █  | █  | █  | █  | █  | █  | █  | █  | █  |
|         | 6  |       |   |   |   |   |   |   |   |   |    |    |    | █  | █  | █  | █  | █  | █  | █  | █  | █  | █  |
|         | 7  |       |   |   |   |   |   |   |   |   |    |    |    |    |    | █  | █  | █  | █  | █  | █  | █  | █  |
|         | 8  |       |   |   |   |   |   |   |   |   |    |    |    |    |    |    |    | █  | █  | █  | █  | █  | █  |
|         | 9  |       |   |   |   |   |   |   |   |   |    |    |    |    |    |    |    |    |    | █  | █  | █  | █  |
|         | 10 |       |   |   |   |   |   |   |   |   |    |    |    |    |    |    |    |    |    |    |    | █  | █  |

22 Month

█ Deployment of intervention

Analysis, reporting, dissemination and publication

12 Month
